# Supplementary material for: Pyroptosis: A Promising Mechanism Linking SARS-CoV-2 Infection to Adverse Pregnancy Outcomes
Source: MDPI journal article supplement (doi:10.3390/ijms24119278), 2023-05-25
Supplement: s1 [file s1]

# Pyroptosis: a promising mechanism linking SARS-CoV-2 infection to adverse pregnancy outcomes

Paola Monti <sup>1</sup>, Giulia Solazzo <sup>1</sup>, Veronica Accurti <sup>2</sup>, Bianca Gambitta <sup>2</sup>, Simona Iodice <sup>1</sup>, Simona Boito <sup>2</sup>, Laura Cantone <sup>1</sup>, Alessandro Manenti <sup>3</sup>, Laura Dioni <sup>1</sup>, Emanuele Montomoli <sup>3,4</sup>, Nicola Persico <sup>2,5,6†\*</sup> and Valentina Bollati <sup>1,6,7†\*</sup>

<sup>1</sup> EPIGET Lab, Department of Clinical Sciences and Community Health, University of Milan, Milan, Italy; paola.monti@unimi.it; giulia.solazzo@unimi.it; simona.iodice@unimi.it; laura.cantone@unimi.it; laura.dioni@unimi.it; valentina.bollati@unimi.it

<sup>2</sup> Fetal Medicine and Surgery Service, Fondazione IRCCS Ca' Granda, Ospedale Maggiore Policlinico, Milan, Italy; veronica.accurti@gmail.com; b.gambitta@gmail.com; simona.boito@gmail.com; nicola.persico@unimi.it

<sup>3</sup> VisMederi Srl, Siena, Italy; alessandro.manenti@vismederi.com; montomoli@vismederi.com

<sup>4</sup> Department of Molecular and Developmental Medicine, University of Siena, Siena, Italy; emanuele.montomoli@unisi.it

<sup>5</sup> Department of Clinical Sciences and Community Health, University of Milan, Milan, Italy; nicola.persico@unimi.it

<sup>6</sup> CRC, Center for Environmental Health, University of Milan, Milan, Italy; nicola.persico@unimi.it; valentina.bollati@unimi.it

<sup>7</sup> Occupational Health Unit, Fondazione IRCCS Ca' Granda Ospedale Maggiore Policlinico, Milan, Italy; valentina.bollati@unimi.it

† These authors contributed equally to this work and share last authorship.

\* Correspondence: nicola.persico@unimi.it (NP); valentina.bollati@unimi.it (VB)

**Citation:** To be added by editorial staff during production.

Academic Editor: Firstname Last-name

Received: date

Revised: date

Accepted: date

Published: date

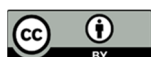

**Copyright:** © 2023 by the authors.

Submitted for possible open access publication under the terms and conditions of the Creative Commons Attribution (CC BY) license (<https://creativecommons.org/licenses/by/4.0/>).

**Supplementary Table S1.** Clinical characteristics of 231 pregnant women, according to IgG, IgM or IgA positivity.

| Characteristics                                 | Mean ± SD or frequency (%) |                         |              | p-value |
|-------------------------------------------------|----------------------------|-------------------------|--------------|---------|
|                                                 | Negatives<br>n=127         | Any positivity<br>n=104 | All<br>n=231 |         |
| Age, years                                      | 34.0 ± 4.6                 | 33.2 ± 4.8              | 33.6 ± 4.7   | 0.218   |
| Gestational age at sample, weeks                | 11.7 ± 0.6                 | 11.7 ± 0.6              | 11.7 ± 1.0   | 0.619   |
| <b><u>Anthropometric features</u></b>           |                            |                         |              |         |
| Maternal weight, Kg                             | 61.4 ± 10.8                | 64.6 ± 13.4             | 62.8 ± 12.1  | 0.049   |
| BMI, Kg/m²                                      | 22.5 ± 3.8                 | 23.7 ± 4.3              | 23.1 ± 4.1   | 0.028   |
| <i>Categorical BMI</i>                          |                            |                         |              |         |
| Underweight (BMI < 18.5)                        | 8 (6.3%)                   | 4 (3.9%)                | 12 (5.2%)    | 0.048   |
| Lean (18.5 ≤ BMI < 25)                          | 98 (77.2%)                 | 69 (66.4%)              | 167 (72.3%)  |         |
| Overweight (BMI ≥ 25)                           | 21 (16.5%)                 | 31 (29.8%)              | 52 (22.5%)   |         |
| <b><u>Smoking habits, n (%)</u></b>             |                            |                         |              |         |
| Never smoked                                    | 113 (89.0%)                | 94 (90.4%)              | 207 (89.6%)  | 0.587   |
| Stopped during pregnancy                        | 7 (5.5%)                   | 7 (6.7%)                | 14 (6.1%)    |         |
| Smoker                                          | 7 (5.5%)                   | 3 (2.9%)                | 10 (4.3%)    |         |
| <b><u>Features related to pregnancy</u></b>     |                            |                         |              |         |
| <i>Parity</i>                                   |                            |                         |              |         |
| Nulliparity                                     | 81 (63.8%)                 | 67 (64.4%)              | 148 (64.1%)  | 0.919   |
| Multiparity                                     | 46 (36.2%)                 | 37 (35.6%)              | 83 (35.9%)   |         |
| <i>Birth delivery mode, n(%)</i>                |                            |                         |              |         |
| Spontaneous                                     | 49 (38.6%)                 | 48 (46.2%)              | 97 (42.0%)   | 0.402   |
| Induction                                       | 52 (40.9%)                 | 34 (32.7%)              | 86 (37.2%)   |         |
| Cesarean                                        | 26 (20.5%)                 | 21 (20.2%)              | 47 (20.3%)   |         |
| <i>Previously spontaneous delivery</i>          |                            |                         |              |         |
| 16-30 weeks                                     | 2 (1.6%)                   | 3 (2.9%)                | 5 (2.2%)     | 0.66    |
| 31-36 weeks                                     | 6 (4.7%)                   | 4 (3.8%)                | 10 (4.3%)    | 1.0     |
| 37+ weeks                                       | 40 (31.5%)                 | 34 (32.7%)              | 74 (32.0%)   | 0.846   |
| Gestational age at delivery, weeks              | 39.4 ± 1.3                 | 39.3 ± 1.3              | 39.3 ± 1.3   | 0.400   |
| <i>Conception method</i>                        |                            |                         |              |         |
| Spontaneous                                     | 123 (96.9%)                | 98 (94.2%)              | 221 (95.7%)  | 0.352   |
| Fertilization technique                         | 4 (3.1%)                   | 6 (5.8%)                | 10 (4.3%)    |         |
| <i>Type of fertilization technique (n=10)</i>   |                            |                         |              |         |
| IVF                                             | 3 (75.0%)                  | 2 (33.3%)               | 5 (50.0%)    |         |
| ICSI                                            | 0 (0.0%)                   | 1 (16.7%)               | 1 (10.0%)    |         |
| Egg donation                                    | 1 (25.0%)                  | 3 (50.0%)               | 4 (40%)      |         |
| <b><u>Anamnesis</u></b>                         |                            |                         |              |         |
| Chronic Hypertension                            | 2 (1.6%)                   | 1 (1.0%)                | 3 (1.3%)     | 1.0     |
| Systemic lupus erythematosus                    | 0 (0.0%)                   | 1 (1.0%)                | 1 (0.4%)     | 0.45    |
| Antiphospholipid antibody syndrome              | 1 (0.8%)                   | 1 (1.0%)                | 2 (0.9%)     | 1.0     |
| <i>Family history of Pre-eclampsia</i>          | 4 (3.1%)                   | 7 (6.7%)                | 11 (4.8%)    | 0.229   |
| Mother affected                                 | 4 (3.1%)                   | 6 (5.8%)                | 10 (4.3%)    |         |
| Sister affected                                 | 0 (0.0%)                   | 1 (1.0%)                | 1 (0.4%)     |         |
| High risk of Pre-eclampsia risk bitest (≥1:150) | 20 (15.7%)                 | 16 (15.4%)              | 36 (15.6%)   | 0.919   |
| Pre-eclampsia diagnosis                         | 4 (3.15%)                  | 2 (1.9%)                | 6 (2.6%)     | 0.693   |

|                                                  |                |                |                |       |
|--------------------------------------------------|----------------|----------------|----------------|-------|
| Previous Small for Gestational Age (SGA) Newborn | 2 (1.6%)       | 3 (2.9%)       | 5 (2.2%)       | 0.654 |
| <i>Delivery mode</i>                             |                |                |                |       |
| Caesarean section                                | 45 (35.4%)     | 37 (35.6%)     | 82 (35.5%)     | 0.896 |
| Vaginal                                          | 75 (59.1%)     | 61 (58.7%)     | 136 (58.9%)    |       |
| Ventouse                                         | 0 (0.0%)       | 1 (1.0%)       | 1 (0.4%)       |       |
| Vacuum                                           | 7 (5.5%)       | 5 (4.8%)       | 12 (5.2%)      |       |
| <b><u>Adverse outcome</u></b>                    |                |                |                |       |
| Composite adverse outcome                        | 14 (11.0%)     | 18 (17.3%)     | 32 (13.9%)     | 0.169 |
| Pre-eclampsia                                    | 2 (1.6%)       | 3 (2.9%)       | 5 (2.2%)       | 0.660 |
| Gestational diabetes                             | 5 (3.9%)       | 6 (5.8%)       | 11 (4.8%)      | 0.549 |
| Abnormal growth                                  | 8 (6.3%)       | 9 (8.7%)       | 17 (7.4%)      | 0.495 |
| <i>Small for gestational age</i>                 | 4 (3.2%)       | 2 (1.9%)       | 6 (2.6%)       | 0.693 |
| <i>Large for gestational age</i>                 | 4 (3.2%)       | 7 (6.7%)       | 11 (4.8%)      | 0.229 |
| Delivery < 34 weeks                              | 0 (0.0%)       | 1 (1.0%)       | 1 (0.4%)       | 0.450 |
| <b><u>Neonatal parameters</u></b>                |                |                |                |       |
| Weight, gr                                       | 3321.0 ± 447.0 | 3301.7 ± 417.4 | 3312.0 ± 432.9 | 0.737 |
| <i>Sex</i>                                       |                |                |                |       |
| Female                                           | 55 (43.3%)     | 47 (45.2%)     | 102 (44.2%)    | 0.774 |
| Male                                             | 72 (56.7%)     | 57 (54.8%)     | 129 (55.8%)    |       |
| NICU admission                                   | 1 (0.8%)       | 3 (2.9%)       | 4 (1.7%)       | 0.329 |

Means of the two groups (Any positivity vs Negatives) were compared with t-test. Frequencies were compared with Chi-Square or Fisher's Exact test when the expected count was less than 5. IVF, In Vitro Fertilization; ICSI, Intra Cytoplasmic Sperm Injection; NICU, Neonatal Intensive Care Unit.

**Supplementary Table S2.** Mean NLRP3 concentrations measured at T0 and at T1, for women with and without APOs, for women with and without any positivity for Ig, and for women with and without positive MN assays.

| Strata          |          | Mean NLRP3 | Standard Deviation | p-value |
|-----------------|----------|------------|--------------------|---------|
| Time            | T0       | 18.3       | 2.4                | 0.288   |
|                 | T1       | 18.1       | 2.3                |         |
| Adverse outcome | No       | 18.3       | 2.4                | 0.615   |
|                 | Yes      | 18.5       | 1.9                |         |
| Any positivity  | Negative | 18.3       | 2.3                | 0.938   |
|                 | Positive | 18.3       | 2.4                |         |
| MN              | Negative | 18.3       | 2.2                | 0.814   |
|                 | Positive | 18.2       | 3.3                |         |

Means of the two groups (T0 vs T1; APOs No vs Yes; Any Ig positivity Yes vs No; MN Negative vs Positive) were compared with t-test.

**Supplementary Table S3.** Plasmatic miRNA levels between cases and controls.

| miRNA           | Means (95% CI)          |                       | p-value      |
|-----------------|-------------------------|-----------------------|--------------|
|                 | Any positivity<br>n=104 | Negatives<br>n=127    |              |
| hsa-miR-101-3p  | 0.12 (0.1 - 0.14)       | 0.13 (0.11 - 0.14)    | 0.510        |
| hsa-miR-106a-5p | 23 (17.1 - 31)          | 24.39 (18.65 - 31.9)  | 0.779        |
| hsa-miR-125a-5p | 0.17 (0.15 - 0.2)       | 0.19 (0.16 - 0.22)    | 0.528        |
| hsa-miR-126-3p  | 20.04 (17.27 - 23.25)   | 24.34 (21.27 - 27.86) | 0.058        |
| hsa-miR-132-3p  | 0.4 (0.34 - 0.47)       | 0.41 (0.36 - 0.48)    | 0.724        |
| hsa-miR-146a-5p | 15 (13.05 - 17.23)      | 17.98 (15.85 - 20.4)  | 0.059        |
| hsa-miR-155-5p  | 0.9 (0.78 - 1.05)       | 1.1 (0.97 - 1.26)     | <b>0.047</b> |
| hsa-miR-195-5p  | 4.4 (3.3 - 5.7)         | 4 (3.1 - 5.2)         | 0.681        |
| hsa-miR-210-3p  | 0.77 (0.66 - 0.89)      | 0.81 (0.71 - 0.93)    | 0.590        |
| hsa-miR-21-5p   | 3.14 (2.68 - 3.69)      | 3.64 (3.15 - 4.21)    | 0.183        |
| hsa-miR-221-3p  | 3.07 (2.64 - 3.57)      | 3.82 (3.33 - 4.38)    | <b>0.037</b> |
| hsa-miR-223-3p  | 583 (507.2 - 670.1)     | 656.6 (578.6 - 745.1) | 0.215        |
| hsa-miR-34a-5p  | 0.04 (0.03 - 0.05)      | 0.04 (0.03 - 0.05)    | 0.805        |

Marginal means from ANCOVA models for repeated measures adjusted for time, maternal age and gestational week at blood examination. Dependent variable were log<sub>2</sub>(RQ), independent variable was the binomial classification of woman as negatives or any positivity (IgG, IgM, IgA) at the first trimester of pregnancy or peripartum.

**Supplementary Table S4.** Association between IgG positivity and miRNA expression level measured in the first trimester of pregnancy and peripartum

| miRNA           | First trimester |         |         | p-value | Peripartum   |         |         | p-value |
|-----------------|-----------------|---------|---------|---------|--------------|---------|---------|---------|
|                 | $\beta$ IgG+    | 95% LCI | 95% UCI |         | $\beta$ IgG+ | 95% LCI | 95% UCI |         |
| hsa-miR-21-5p   | 0.28            | -0.2    | 0.76    | 0.249   | 0.16         | -0.2    | 0.52    | 0.390   |
| hsa-miR-34a-5p  | 0.03            | -0.51   | 0.56    | 0.914   | -0.10        | -0.59   | 0.39    | 0.692   |
| hsa-miR-101-3p  | 0.15            | -0.29   | 0.6     | 0.501   | -0.01        | -0.38   | 0.36    | 0.956   |
| hsa-miR-106a-5p | 0.09            | -0.71   | 0.9     | 0.818   | 0.16         | -0.52   | 0.85    | 0.642   |
| hsa-miR-125a-5p | 0.1             | -0.38   | 0.58    | 0.675   | 0.08         | -0.32   | 0.48    | 0.702   |
| hsa-miR-126-3p  | 0.26            | -0.17   | 0.69    | 0.232   | 0.19         | -0.22   | 0.6     | 0.356   |
| hsa-miR-132-3p  | 0.05            | -0.43   | 0.53    | 0.840   | -0.08        | -0.46   | 0.29    | 0.668   |
| hsa-miR-146a-5p | 0.34            | -0.1    | 0.78    | 0.133   | 0.07         | -0.28   | 0.42    | 0.678   |
| hsa-miR-155-5p  | 0.15            | -0.3    | 0.61    | 0.507   | 0.22         | -0.14   | 0.57    | 0.230   |
| hsa-miR-195-5p  | -0.18           | -0.93   | 0.58    | 0.647   | -0.04        | -0.64   | 0.55    | 0.890   |
| hsa-miR-210-3p  | 0.03            | -0.42   | 0.48    | 0.891   | 0.09         | -0.27   | 0.44    | 0.639   |
| hsa-miR-221-3p  | 0.29            | -0.2    | 0.78    | 0.248   | 0.3          | -0.09   | 0.69    | 0.128   |
| hsa-miR-223-3p  | 0.33            | -0.14   | 0.8     | 0.168   | -0.03        | -0.36   | 0.3     | 0.872   |

Estimates from a multivariable linear mixed model for repeated measures adjusted for time, gestational age at the sample, and maternal age. miRNAs are expressed as  $\log_2(\text{RQ})$ .  $\beta$  IgG+ is the estimated variation in miRNA expression level, in women with positive IgG, compared to negatives. The p-value refers to the difference in miRNA expression between positive and negative IgG. P-values controlled for multiple testing were not significant (FDR p-value>0.70) for all models.

**Supplementary Table S5.** Association between IgM positivity and miRNA expression level, in the first trimester of pregnancy and peripartum

| miRNA           | First trimester |         |         | p-value | Peripartum   |         |         | p-value |
|-----------------|-----------------|---------|---------|---------|--------------|---------|---------|---------|
|                 | $\beta$ IgM+    | 95% LCI | 95% UCI |         | $\beta$ IgM+ | 95% LCI | 95% UCI |         |
| hsa-miR-21-5p   | 0.12            | -0.7    | 0.95    | 0.766   | -0.04        | -0.46   | 0.39    | 0.872   |
| hsa-miR-34a-5p  | 0.10            | -0.82   | 1.01    | 0.835   | 0.11         | -0.47   | 0.68    | 0.719   |
| hsa-miR-101-3p  | 0.21            | -0.56   | 0.97    | 0.595   | 0.074        | -0.357  | 0.504   | 0.736   |
| hsa-miR-106a-5p | 0.51            | -0.86   | 1.89    | 0.463   | 0.05         | -0.76   | 0.86    | 0.902   |
| hsa-miR-125a-5p | -0.02           | -0.84   | 0.8     | 0.958   | 0.3          | -0.17   | 0.77    | 0.212   |
| hsa-miR-126-3p  | 0.39            | -0.34   | 1.13    | 0.296   | 0.41         | -0.07   | 0.89    | 0.094   |
| hsa-miR-132-3p  | 0.17            | -0.64   | 0.99    | 0.676   | 0.21         | -0.24   | 0.65    | 0.362   |
| hsa-miR-146a-5p | 0.31            | -0.44   | 1.07    | 0.413   | 0.15         | -0.26   | 0.56    | 0.474   |
| hsa-miR-155-5p  | -0.06           | -0.84   | 0.72    | 0.88    | 0.26         | -0.16   | 0.67    | 0.227   |
| hsa-miR-195-5p  | 0.49            | -0.81   | 1.79    | 0.458   | -0.2         | -0.9    | 0.5     | 0.57    |
| hsa-miR-210-3p  | 0.63            | -0.15   | 1.4     | 0.111   | 0.29         | -0.13   | 0.71    | 0.178   |
| hsa-miR-221-3p  | 0.01            | -0.84   | 0.86    | 0.982   | 0.31         | -0.14   | 0.77    | 0.179   |
| hsa-miR-223-3p  | 0.75            | -0.05   | 1.55    | 0.066   | 0.04         | -0.35   | 0.42    | 0.857   |

Estimates from a multivariable linear mixed model for repeated measures adjusted for time, gestational age at the sample, and maternal age. miRNAs are expressed as  $\log_2(RQ)$ .  $\beta$  IgM+ is the estimated variation in miRNA expression level, in women with positive IgM, compared to negatives. The p-value refers to the difference in miRNA expression between positive and negative IgM. P-values controlled for multiple testing were not significant (FDR p-value>0.60) for all models.

**Supplementary Table S6.** Association between IgA positivity and miRNA expression level, in the first trimester of pregnancy and peripartum

| miRNA           | First trimester |         |         | p-value | Peripartum   |         |         | p-value |
|-----------------|-----------------|---------|---------|---------|--------------|---------|---------|---------|
|                 | $\beta$ IgA+    | 95% LCI | 95% UCI |         | $\beta$ IgA+ | 95% LCI | 95% UCI |         |
| hsa-miR-21-5p   | -0.17           | -1.78   | 1.43    | 0.831   | 0.02         | -0.58   | 0.61    | 0.957   |
| hsa-miR-34a-5p  | 0.17            | -1.62   | 1.95    | 0.853   | 0.25         | -0.55   | 1.06    | 0.535   |
| hsa-miR-101-3p  | -0.06           | -1.54   | 1.43    | 0.938   | 0.12         | -0.48   | 0.73    | 0.689   |
| hsa-miR-106a-5p | -0.95           | -3.63   | 1.73    | 0.486   | 0.16         | -0.97   | 1.29    | 0.777   |
| hsa-miR-125a-5p | 0.32            | -1.27   | 1.92    | 0.69    | -0.08        | -0.73   | 0.58    | 0.819   |
| hsa-miR-126-3p  | 0.45            | -0.98   | 1.89    | 0.537   | 0.34         | -0.33   | 1.01    | 0.319   |
| hsa-miR-132-3p  | -0.16           | -1.75   | 1.43    | 0.84    | 0.15         | -0.47   | 0.78    | 0.624   |
| hsa-miR-146a-5p | 0.58            | -0.89   | 2.05    | 0.44    | -0.06        | -0.64   | 0.52    | 0.841   |
| hsa-miR-155-5p  | 0.10            | -1.42   | 1.62    | 0.897   | -0.21        | -0.79   | 0.37    | 0.48    |
| hsa-miR-195-5p  | 0.62            | -1.91   | 3.14    | 0.632   | 0.25         | -0.73   | 1.23    | 0.618   |
| hsa-miR-210-3p  | 0.14            | -1.37   | 1.65    | 0.858   | 0.39         | -0.20   | 0.98    | 0.192   |
| hsa-miR-221-3p  | 0.23            | -1.42   | 1.88    | 0.785   | -0.08        | -0.72   | 0.57    | 0.811   |
| hsa-miR-223-3p  | 0.45            | -1.12   | 2.02    | 0.573   | 0.19         | -0.36   | 0.73    | 0.502   |

Estimates from a multivariable linear mixed model for repeated measures adjusted for time, gestational age at the sample, and maternal age. miRNAs are expressed as  $\log_2(\text{RQ})$ .  $\beta$  IgA+ is the estimated variation in miRNA expression level, in women with positive IgA, compared to negatives The p-value refers to the difference in miRNA expression between positive and negative IgA.



**Supplementary Table S7.** Association between MN positivity and miRNA expression level, in the first trimester of pregnancy and peripartum

| miRNA-name      | First trimester |         |         | p-value | Peripartum  |         |         | p-value |
|-----------------|-----------------|---------|---------|---------|-------------|---------|---------|---------|
|                 | $\beta$ MN+     | 95% LCI | 95% UCI |         | $\beta$ MN+ | 95% LCI | 95% UCI |         |
| hsa-miR-21-5p   | 0.39            | -0.17   | 0.96    | 0.174   | 0.03        | -0.35   | 0.41    | 0.874   |
| hsa-miR-34a-5p  | -0.23           | -0.86   | 0.40    | 0.479   | -0.02       | -0.53   | 0.49    | 0.945   |
| hsa-miR-101-3p  | 0.15            | -0.38   | 0.67    | 0.585   | -0.06       | -0.44   | 0.32    | 0.773   |
| hsa-miR-106a-5p | 0.07            | -0.88   | 1.02    | 0.887   | -0.11       | -0.82   | 0.60    | 0.764   |
| hsa-miR-125a-5p | 0.11            | -0.46   | 0.67    | 0.712   | 0.08        | -0.33   | 0.49    | 0.705   |
| hsa-miR-126-3p  | 0.29            | -0.22   | 0.79    | 0.262   | 0.13        | -0.29   | 0.56    | 0.535   |
| hsa-miR-132-3p  | 0.13            | -0.43   | 0.69    | 0.641   | -0.07       | -0.46   | 0.32    | 0.724   |
| hsa-miR-146a-5p | 0.42            | -0.10   | 0.94    | 0.111   | 0.08        | -0.29   | 0.44    | 0.670   |
| hsa-miR-155-5p  | 0.40            | -0.14   | 0.94    | 0.142   | 0.13        | -0.24   | 0.50    | 0.481   |
| hsa-miR-195-5p  | 0.17            | -0.73   | 1.06    | 0.711   | 0.14        | -0.48   | 0.76    | 0.662   |
| hsa-miR-210-3p  | 0.11            | -0.43   | 0.64    | 0.696   | 0.04        | -0.33   | 0.42    | 0.813   |
| hsa-miR-221-3p  | 0.34            | -0.24   | 0.93    | 0.244   | 0.26        | -0.14   | 0.67    | 0.206   |
| hsa-miR-223-3p  | 0.54            | -0.02   | 1.09    | 0.057   | 0.05        | -0.29   | 0.40    | 0.761   |

Estimates from a multivariable linear mixed model for repeated measures adjusted for time, gestational age at the sample, and maternal age. miRNAs are expressed as  $\log_2(RQ)$ .  $\beta$  MN+ is the estimated variation in miRNA expression level, in women with positive MN, compared to negatives. The p-value refers to the difference in miRNA expression between positive and negative MN.

**Supplementary table S8.** Estimates and percentage change of miRNA expression level in women having an adverse outcome during pregnancy, versus women not experiencing it.

| Adverse outcome<br>(DV)   | miRNA           | $\beta_{\text{miRNA}}$ (SE) | Percentage<br>change | 95% LCI | 95% UCI | p-value      | p-value adj |
|---------------------------|-----------------|-----------------------------|----------------------|---------|---------|--------------|-------------|
| Composite adverse outcome | hsa-miR-21-5p   | 0.16 (0.23)                 | 11.4                 | -18.5   | 52.2    | 0.498        | 0.871       |
|                           | hsa-miR-34a-5p  | 0.18 (0.27)                 | 13.7                 | -20.9   | 63.3    | 0.487        | 0.852       |
|                           | hsa-miR-101-3p  | 0.11 (0.21)                 | 8.2                  | -19.1   | 44.5    | 0.595        | 0.882       |
|                           | hsa-miR-106a-5p | -0.01 (0.42)                | -0.4                 | -43.9   | 76.9    | 0.990        | 0.990       |
|                           | hsa-miR-125a-5p | 0.01 (0.23)                 | 0.4                  | -26.6   | 37.4    | 0.978        | 0.978       |
|                           | hsa-miR-126-3p  | 0.17 (0.21)                 | 12.6                 | -15.4   | 50.0    | 0.413        | 0.961       |
|                           | hsa-miR-132-3p  | 0.10 (0.23)                 | 6.9                  | -22.3   | 47.1    | 0.680        | 0.793       |
|                           | hsa-miR-146a-5p | 0.23 (0.20)                 | 17.3                 | -10.7   | 54.2    | 0.251        | 0.877       |
|                           | hsa-miR-155-5p  | 0.21 (0.21)                 | 15.4                 | -13.5   | 53.9    | 0.330        | 0.769       |
|                           | hsa-miR-195-5p  | 0.05 (0.39)                 | 3.8                  | -39.3   | 77.6    | 0.891        | 0.891       |
|                           | hsa-miR-210-3p  | 0.26 (0.21)                 | 19.6                 | -10.5   | 59.8    | 0.224        | 0.784       |
|                           | hsa-miR-221-3p  | -0.01 (0.22)                | -0.5                 | -26.2   | 34      | 0.972        | 0.972       |
|                           | hsa-miR-223-3p  | 0.15 (0.20)                 | 11.0                 | -15.4   | 45.7    | 0.449        | 0.786       |
| Pre-eclampsia             | hsa-miR-21-5p   | -0.13 (0.54)                | -8.5                 | -56.4   | 92.2    | 0.814        | 0.933       |
|                           | hsa-miR-34a-5p  | 0.74 (0.63)                 | 66.9                 | -29.0   | 292.6   | 0.239        | 0.836       |
|                           | hsa-miR-101-3p  | -0.34 (0.50)                | -21                  | -60.2   | 56.9    | 0.499        | 0.882       |
|                           | hsa-miR-106a-5p | -1.95 (0.99)                | -74.1                | -93.3   | -0.3    | <b>0.050</b> | 0.116       |
|                           | hsa-miR-125a-5p | -0.51 (0.54)                | -29.7                | -66.5   | 47.4    | 0.349        | 0.611       |
|                           | hsa-miR-126-3p  | -0.07 (0.50)                | -4.7                 | -51.6   | 87.6    | 0.889        | 0.961       |
|                           | hsa-miR-132-3p  | -0.76 (0.55)                | -41                  | -72.2   | 25.3    | 0.169        | 0.428       |

|                      |                 |              |       |       |        |              |       |
|----------------------|-----------------|--------------|-------|-------|--------|--------------|-------|
|                      | hsa-miR-146a-5p | 0.15 (0.48)  | 10.7  | -42.2 | 111.7  | 0.759        | 0.885 |
|                      | hsa-miR-155-5p  | 0.13 (0.50)  | 9.3   | -44.9 | 116.7  | 0.798        | 0.882 |
|                      | hsa-miR-195-5p  | 1.70 (0.93)  | 224.6 | -8.3  | 1049.5 | 0.068        | 0.475 |
|                      | hsa-miR-210-3p  | 0.20 (0.50)  | 14.8  | -42.3 | 128.4  | 0.692        | 0.969 |
|                      | hsa-miR-221-3p  | -0.29 (0.52) | -18.3 | -59.6 | 65.3   | 0.573        | 0.972 |
|                      | hsa-miR-223-3p  | -0.01 (0.47) | -0.6  | -47.9 | 89.3   | 0.984        | 0.984 |
| Gestational diabetes | hsa-miR-21-5p   | 0.70 (0.37)  | 62.1  | -2.6  | 169.6  | 0.063        | 0.220 |
|                      | hsa-miR-34a-5p  | 0.05 (0.44)  | 3.5   | -43.1 | 88.2   | 0.910        | 0.910 |
|                      | hsa-miR-101-3p  | 0.48 (0.35)  | 39.8  | -13.1 | 124.9  | 0.166        | 0.882 |
|                      | hsa-miR-106a-5p | 1.52 (0.68)  | 187.3 | 13.2  | 628.8  | <b>0.026</b> | 0.093 |
|                      | hsa-miR-125a-5p | 0.49 (0.38)  | 40.0  | -16.3 | 134    | 0.198        | 0.611 |
|                      | hsa-miR-126-3p  | 0.55 (0.34)  | 46.4  | -8.6  | 134.4  | 0.112        | 0.786 |
|                      | hsa-miR-132-3p  | 0.51 (0.38)  | 42.3  | -15.5 | 139.8  | 0.184        | 0.428 |
|                      | hsa-miR-146a-5p | 0.48 (0.33)  | 39.3  | -11.1 | 118.3  | 0.147        | 0.877 |
|                      | hsa-miR-155-5p  | 0.07 (0.35)  | 5.2   | -34.6 | 69     | 0.834        | 0.882 |
|                      | hsa-miR-195-5p  | -0.83 (0.64) | -43.9 | -76.6 | 34.5   | 0.194        | 0.680 |
|                      | hsa-miR-210-3p  | 0.74 (0.35)  | 66.5  | 3.7   | 167.1  | <b>0.035</b> | 0.244 |
|                      | hsa-miR-221-3p  | 0.06 (0.36)  | 4.0   | -36.4 | 70     | 0.875        | 0.972 |
|                      | hsa-miR-223-3p  | 0.49 (0.33)  | 40.3  | -10.1 | 118.9  | 0.135        | 0.786 |
| Abnormal growth      | hsa-miR-21-5p   | -0.32 (0.3)  | -19.6 | -46.8 | 21.3   | 0.296        | 0.692 |
|                      | hsa-miR-34a-5p  | 0.17 (0.35)  | 12.2  | -30.4 | 80.8   | 0.635        | 0.875 |
|                      | hsa-miR-101-3p  | -0.11 (0.28) | -7.1  | -36.6 | 36.2   | 0.706        | 0.882 |
|                      | hsa-miR-106a-5p | -1 (0.55)    | -49.8 | -76.3 | 6.3    | 0.072        | 0.125 |
|                      | hsa-miR-125a-5p | -0.06 (0.3)  | -4.2  | -36.6 | 44.7   | 0.837        | 0.976 |

|     |                 |              |       |       |       |              |       |
|-----|-----------------|--------------|-------|-------|-------|--------------|-------|
|     | hsa-miR-126-3p  | 0.01 (0.28)  | 0.9   | -30.8 | 47.2  | 0.961        | 0.961 |
|     | hsa-miR-132-3p  | -0.22 (0.31) | -14.1 | -43.6 | 30.8  | 0.477        | 0.668 |
|     | hsa-miR-146a-5p | 0.1 (0.26)   | 7.3   | -25.2 | 54    | 0.700        | 0.885 |
|     | hsa-miR-155-5p  | 0.41 (0.28)  | 33.3  | -8.8  | 94.7  | 0.137        | 0.478 |
|     | hsa-miR-195-5p  | 0.35 (0.52)  | 27.2  | -37.4 | 158.2 | 0.504        | 0.738 |
|     | hsa-miR-210-3p  | -0.13 (0.28) | -8.6  | -37.6 | 34.1  | 0.645        | 0.969 |
|     | hsa-miR-221-3p  | 0.07 (0.29)  | 5.1   | -29.0 | 55.7  | 0.802        | 0.972 |
|     | hsa-miR-223-3p  | 0.06 (0.26)  | 4.1   | -27.3 | 49.1  | 0.825        | 0.962 |
| SGA | hsa-miR-21-5p   | -1.04 (0.49) | -51.3 | -75.1 | -4.7  | <b>0.036</b> | 0.220 |
|     | hsa-miR-34a-5p  | 1.15 (0.57)  | 121.7 | 2.0   | 381.8 | 0.044        | 0.311 |
|     | hsa-miR-101-3p  | 0.09 (0.46)  | 6.3   | -43.2 | 99.1  | 0.847        | 0.882 |
|     | hsa-miR-106a-5p | -2.88 (0.89) | -86.4 | -96.0 | -54.4 | <b>0.001</b> | 0.009 |
|     | hsa-miR-125a-5p | 0.57 (0.49)  | 48.6  | -24.4 | 192   | 0.250        | 0.611 |
|     | hsa-miR-126-3p  | 0.26 (0.45)  | 19.6  | -35.6 | 121.8 | 0.569        | 0.961 |
|     | hsa-miR-132-3p  | -0.72 (0.5)  | -39.5 | -69.6 | 20.4  | 0.152        | 0.428 |
|     | hsa-miR-146a-5p | 0.36 (0.43)  | 28.1  | -29.1 | 131.4 | 0.411        | 0.885 |
|     | hsa-miR-155-5p  | 1.2 (0.45)   | 129.4 | 24.0  | 324.5 | <b>0.008</b> | 0.059 |
|     | hsa-miR-195-5p  | 0.73 (0.85)  | 66.2  | -48.0 | 431   | 0.390        | 0.738 |
|     | hsa-miR-210-3p  | -0.35 (0.46) | -21.7 | -58.2 | 46.7  | 0.444        | 0.969 |
|     | hsa-miR-221-3p  | 0.66 (0.47)  | 58.4  | -16.6 | 200.8 | 0.159        | 0.972 |
|     | hsa-miR-223-3p  | 0.41 (0.43)  | 32.7  | -26.3 | 138.8 | 0.344        | 0.786 |
| LGA | hsa-miR-21-5p   | 0.1 (0.37)   | 7.4   | -35.2 | 78.1  | 0.781        | 0.933 |
|     | hsa-miR-34a-5p  | -0.39 (0.43) | -23.9 | -57.6 | 36.5  | 0.358        | 0.836 |
|     | hsa-miR-101-3p  | -0.21 (0.34) | -13.5 | -45.8 | 38.2  | 0.544        | 0.882 |

|                 |              |       |       |       |       |       |
|-----------------|--------------|-------|-------|-------|-------|-------|
| hsa-miR-106a-5p | 0.11 (0.68)  | 7.9   | -57.3 | 172.7 | 0.872 | 0.990 |
| hsa-miR-125a-5p | -0.41 (0.37) | -25   | -54.7 | 24.3  | 0.264 | 0.611 |
| hsa-miR-126-3p  | -0.12 (0.34) | -8.3  | -42.2 | 45.6  | 0.713 | 0.961 |
| hsa-miR-132-3p  | 0.07 (0.38)  | 5.1   | -37.3 | 76.1  | 0.849 | 0.849 |
| hsa-miR-146a-5p | -0.05 (0.32) | -3.2  | -37.8 | 50.8  | 0.887 | 0.887 |
| hsa-miR-155-5p  | -0.05 (0.34) | -3.4  | -39.5 | 54.0  | 0.882 | 0.882 |
| hsa-miR-195-5p  | 0.12 (0.64)  | 8.8   | -54.4 | 159.3 | 0.849 | 0.891 |
| hsa-miR-210-3p  | 0.003 (0.34) | 0.2   | -37.3 | 60.2  | 0.994 | 0.994 |
| hsa-miR-221-3p  | -0.26 (0.35) | -16.6 | -48.4 | 34.8  | 0.457 | 0.972 |
| hsa-miR-223-3p  | -0.14 (0.32) | -9.3  | -41.5 | 40.8  | 0.663 | 0.928 |

Estimates ( $\beta_{\text{miRNA}}$ ) and percentage change of miRNA expression level in the woman having an adverse outcome during pregnancy versus woman not experiencing it. Multivariable linear mixed models for repeated measures adjusted for time, gestational age at the sample, and maternal age. miRNAs are expressed as  $\log_2(\text{RQ})$ . Percentage change is calculated as  $(2^{\beta}-1) \cdot 100$ .

**Supplementary Table S9.** Interaction of MN with adverse outcomes in the expression level of miRNAs (hsa-miR-125a-5p and hsa-miR-155-5p)

| miRNA           | Adverse outcome           | MN                   | Expression level of miRNA             |                      | p-interaction<br>(MN* adverse out-comes) | p-value raw<br>(MN+ vs MN-) | p-value adj<br>(MN+ vs MN-) |
|-----------------|---------------------------|----------------------|---------------------------------------|----------------------|------------------------------------------|-----------------------------|-----------------------------|
|                 |                           |                      | in women with/without adverse outcome |                      |                                          |                             |                             |
|                 |                           |                      | log <sub>2</sub> (RQ)                 |                      |                                          |                             |                             |
|                 |                           |                      | Without                               | With                 |                                          |                             |                             |
| hsa-miR-125a-5p | Composite adverse outcome | MN-                  | -2.42 (-2.61, -2.24)                  | -2.69 (-3.16, -2.22) | 0.015                                    | 0.04                        | 0.161                       |
|                 |                           | MN+                  | -2.66 (-2.98, -2.33)                  | -1.89 (-2.58, -1.19) |                                          |                             |                             |
|                 | Pre-eclampsia             | MN-                  | -2.44 (-2.61, -2.26)                  | -3.68 (-4.89, -2.47) | 0.016                                    | 0.02                        | 0.078                       |
|                 |                           | MN+                  | -2.55 (-2.85, -2.25)                  | -1.22 (-3.03, 0.59)  |                                          |                             |                             |
|                 | Gestational diabetes      | MN-                  | -2.47 (-2.64, -2.29)                  | -2.25 (-3.1, -1.39)  | 0.239                                    | 0.309                       | 0.715                       |
|                 |                           | MN+                  | -2.59 (-2.9, -2.28)                   | -1.6 (-2.67, -0.52)  |                                          |                             |                             |
|                 | Abnormal growth           | MN-                  | -2.45 (-2.63, -2.27)                  | -2.55 (-3.19, -1.91) | 0.794                                    | 0.885                       | 0.999                       |
|                 |                           | MN+                  | -2.52 (-2.83, -2.21)                  | -2.47 (-3.49, -1.45) |                                          |                             |                             |
|                 | SGA                       | MN-                  | -2.47 (-2.65, -2.3)                   | -1.9 (-2.97, -0.82)  | 0.983                                    | 0.935                       | 1                           |
|                 |                           | MN+                  | -2.54 (-2.84, -2.23)                  | -1.98 (-3.79, -0.17) |                                          |                             |                             |
| LGA             | MN-                       | -2.44 (-2.61, -2.26) | -2.91 (-3.69, -2.12)                  | 0.732                | 0.805                                    | 0.995                       |                             |
|                 | MN+                       | -2.51 (-2.81, -2.2)  | -2.74 (-3.97, -1.51)                  |                      |                                          |                             |                             |
| hsa-miR-155-5p  | Composite adverse outcome | MN-                  | 0.04 (-0.13, 0.2)                     | 0.01 (-0.43, 0.44)   | 0.029                                    | 0.09                        | 0.309                       |
|                 |                           | MN+                  | -0.2 (-0.5, 0.09)                     | 0.62 (-0.01, 1.24)   |                                          |                             |                             |
|                 | Pre-eclampsia             | MN-                  | 0.04 (-0.12, 0.2)                     | -0.44 (-1.56, 0.68)  | 0.033                                    | 0.044                       | 0.156                       |
|                 |                           | MN+                  | -0.1 (-0.37, 0.18)                    | 1.5 (-0.14, 3.14)    |                                          |                             |                             |
|                 | Gestational diabetes      | MN-                  | 0.04 (-0.12, 0.2)                     | -0.09 (-0.88, 0.7)   | 0.329                                    | 0.432                       | 0.848                       |
|                 |                           | MN+                  | -0.09 (-0.37, 0.19)                   | 0.37 (-0.61, 1.35)   |                                          |                             |                             |

|                       |                           |     |                     |                     |              |              |       |
|-----------------------|---------------------------|-----|---------------------|---------------------|--------------|--------------|-------|
| <i>hsa-miR-195-5p</i> | Abnormal growth           | MN- | 0.01 (-0.15, 0.17)  | 0.33 (-0.26, 0.92)  | 0.486        | 0.63         | 0.958 |
|                       |                           | MN+ | -0.11 (-0.4, 0.17)  | 0.58 (-0.33, 1.48)  |              |              |       |
|                       | SGA                       | MN- | 0.01 (-0.15, 0.16)  | 1.06 (0.08, 2.05)   | 0.544        | 0.621        | 0.953 |
|                       |                           | MN+ | -0.1 (-0.38, 0.17)  | 1.52 (-0.1, 3.15)   |              |              |       |
|                       | LGA                       | MN- | 0.04 (-0.12, 0.2)   | -0.09 (-0.82, 0.64) | 0.638        | 0.753        | 0.988 |
|                       |                           | MN+ | -0.07 (-0.34, 0.21) | 0.1 (-0.99, 1.2)    |              |              |       |
|                       | Composite adverse outcome | MN- | 2.03 (1.73, 2.34)   | 2.25 (1.48, 3.01)   | 0.268        | 0.318        | 0.732 |
|                       |                           | MN+ | 2.13 (1.68, 2.58)   | 1.77 (0.78, 2.75)   |              |              |       |
|                       | Pre-eclampsia             | MN- | 2.03 (1.75, 2.31)   | 3.45 (1.47, 5.43)   | 0.503        | 0.511        | 0.897 |
|                       |                           | MN+ | 2.01 (1.59, 2.42)   | 4.37 (1.72, 7.03)   |              |              |       |
|                       | Gestational diabetes      | MN- | 2.1 (1.81, 2.39)    | 1.15 (-0.2, 2.5)    | 0.676        | 0.676        | 0.973 |
|                       |                           | MN+ | 2.09 (1.67, 2.52)   | 1.47 (-0.1, 3.04)   |              |              |       |
|                       | Abnormal growth           | MN- | 2.01 (1.71, 2.3)    | 2.8 (1.76, 3.84)    | <b>0.013</b> | <b>0.018</b> | 0.075 |
|                       |                           | MN+ | 2.14 (1.71, 2.56)   | 1.15 (-0.26, 2.56)  |              |              |       |
|                       | SGA                       | MN- | 2.03 (1.74, 2.31)   | 3.55 (1.76, 5.34)   | <b>0.021</b> | <b>0.022</b> | 0.087 |
|                       |                           | MN+ | 2.09 (1.68, 2.51)   | 0.4 (-2.24, 3.05)   |              |              |       |
|                       | LGA                       | MN- | 2.04 (1.75, 2.33)   | 2.48 (1.19, 3.76)   | 0.134        | 0.147        | 0.435 |
|                       |                           | MN+ | 2.11 (1.68, 2.53)   | 1.31 (-0.38, 3)     |              |              |       |

Estimated marginal means of miRNA expression level from a multivariable linear mixed model for repeated measures adjusted for time, gestational age at the sample, MN, adverse outcome, the interaction between adverse outcome and MN, and maternal age. miRNAs are expressed as log<sub>2</sub>(RQ). The p-interaction refers to the significance of the interaction term (MN\*adverse outcome). The p-value raw (MN+ vs MN-) refers to the difference between positive and negative microneutralization in the group of women experiencing the adverse outcomes. The p-value adj (MN+ vs MN-) refers to p-values adjusted for multiple comparisons.

**Supplementary Table S10.** Interaction of NLRP3 inflammasome with adverse outcomes in the expression level of miRNAs (hsa-miR-101a-3p, hsa-miR-126-3p, hsa-miR-132-3p, and hsa-miR-146a-5p)

| miRNA          | Adverse outcome           |     | expression level of miRNA<br>in women with/without adverse outcome | p-value          | p-value<br>interaction<br>(NLRP3*<br>adverse outcome) |
|----------------|---------------------------|-----|--------------------------------------------------------------------|------------------|-------------------------------------------------------|
| hsa-miR-101-3p | Composite adverse outcome | No  | 0.11 (0.05, 0.17)                                                  | <b>&lt;0.001</b> | 0.129                                                 |
|                |                           | Yes | -0.05 (-0.25, 0.15)                                                | 0.604            |                                                       |
|                | Pre-eclampsia             | No  | 0.1 (0.04, 0.16)                                                   | <b>0.001</b>     | 0.626                                                 |
|                |                           | Yes | -0.04 (-0.58, 0.51)                                                | 0.898            |                                                       |
|                | Gestational diabetes      | No  | 0.1 (0.04, 0.16)                                                   | <b>0.001</b>     | 0.544                                                 |
|                |                           | Yes | -0.01 (-0.36, 0.34)                                                | 0.954            |                                                       |
|                | Abnormal growth           | No  | 0.11 (0.05, 0.17)                                                  | <b>&lt;0.001</b> | <b>0.046</b>                                          |
|                |                           | Yes | -0.16 (-0.42, 0.1)                                                 | 0.225            |                                                       |
|                | SGA                       | No  | 0.11 (0.05, 0.17)                                                  | <b>&lt;0.001</b> | <b>0.033</b>                                          |
|                |                           | Yes | -0.22 (-0.52, 0.08)                                                | 0.145            |                                                       |
| hsa-miR-126-3p | LGA                       | No  | 0.1 (0.04, 0.16)                                                   | <b>0.001</b>     | 0.678                                                 |
|                |                           | Yes | -0.02 (-0.6, 0.55)                                                 | 0.934            |                                                       |
|                | Composite adverse outcome | No  | 0.1 (0.04, 0.16)                                                   | <b>0.001</b>     | 0.781                                                 |
|                |                           | Yes | 0.13 (-0.07, 0.34)                                                 | 0.208            |                                                       |
|                | Pre-eclampsia             | No  | 0.1 (0.04, 0.16)                                                   | <b>0.001</b>     | 0.063                                                 |
|                |                           | Yes | 0.62 (0.07, 1.17)                                                  | <b>0.026</b>     |                                                       |
|                | Gestational diabetes      | No  | 0.1 (0.04, 0.16)                                                   | <b>0.001</b>     | 0.706                                                 |
|                |                           | Yes | 0.17 (-0.19, 0.53)                                                 | 0.352            |                                                       |
|                | Abnormal growth           | No  | 0.11 (0.05, 0.17)                                                  | <b>0.001</b>     | 0.795                                                 |



|                 |                           |     |                      |                  |              |
|-----------------|---------------------------|-----|----------------------|------------------|--------------|
| hsa-miR-132-3p  | SGA                       | Yes | 0.07 (-0.19, 0.33)   | 0.587            | 0.969        |
|                 |                           | No  | 0.1 (0.04, 0.16)     | <b>0.001</b>     |              |
|                 |                           | Yes | 0.1 (-0.2, 0.39)     | 0.513            |              |
|                 |                           | No  | 0.11 (0.05, 0.17)    | <b>&lt;0.001</b> |              |
|                 |                           | Yes | -0.12 (-0.71, 0.46)  | 0.683            |              |
|                 | Composite adverse outcome | No  | 0.06 (0, 0.13)       | 0.064            | 0.071        |
|                 |                           | Yes | -0.14 (-0.36, 0.07)  | 0.186            |              |
|                 | Pre-eclampsia             | No  | 0.05 (-0.01, 0.12)   | 0.099            | 0.134        |
|                 |                           | Yes | -0.37 (-0.91, 0.18)  | 0.187            |              |
|                 | Gestational diabetes      | No  | 0.04 (-0.02, 0.11)   | 0.193            | 0.816        |
|                 |                           | Yes | 0.09 (-0.28, 0.45)   | 0.644            |              |
|                 | Abnormal growth           | No  | 0.07 (0, 0.13)       | <b>0.039</b>     | <b>0.002</b> |
|                 |                           | Yes | -0.38 (-0.66, -0.11) | <b>0.007</b>     |              |
|                 | SGA                       | No  | 0.06 (0, 0.13)       | <b>0.049</b>     | <b>0.005</b> |
|                 |                           | Yes | -0.41 (-0.73, -0.09) | <b>0.012</b>     |              |
|                 | LGA                       | No  | 0.05 (-0.02, 0.11)   | 0.136            | 0.414        |
|                 |                           | Yes | -0.2 (-0.8, 0.39)    | 0.507            |              |
| hsa-miR-146a-5p | Composite adverse outcome | No  | 0.09 (0.03, 0.15)    | <b>0.003</b>     | 0.471        |
|                 |                           | Yes | 0.16 (-0.03, 0.36)   | 0.101            |              |
|                 | Pre-eclampsia             | No  | 0.09 (0.04, 0.15)    | <b>0.001</b>     | 0.149        |
|                 |                           | Yes | 0.5 (-0.05, 1.04)    | 0.075            |              |
|                 | Gestational diabetes      | No  | 0.09 (0.04, 0.15)    | <b>0.001</b>     | 0.601        |
|                 |                           | Yes | 0.18 (-0.15, 0.52)   | 0.285            |              |
|                 | Abnormal growth           | No  | 0.1 (0.04, 0.15)     | <b>0.001</b>     | 0.925        |
|                 |                           | Yes | 0.11 (-0.15, 0.36)   | 0.403            |              |

|     |     |                     |              |       |
|-----|-----|---------------------|--------------|-------|
| SGA | No  | 0.09 (0.04, 0.15)   | <b>0.001</b> | 0.854 |
|     | Yes | 0.12 (-0.17, 0.41)  | 0.408        |       |
| LGA | No  | 0.1 (0.04, 0.15)    | <b>0.001</b> | 0.697 |
|     | Yes | -0.01 (-0.58, 0.55) | 0.959        |       |

Estimates of miRNAs expression levels from a multivariable linear mixed model for repeated measures adjusted for time, gestational age at the sample, NLRP3 inflammasome, adverse outcome, the interaction between adverse outcome and NLRP3 inflammasome, and maternal age as a fixed effect. The intercept was regarded as a random effect. miRNAs are expressed as log<sub>2</sub>(RQ). The p-interaction refers to the significance of the interaction term (NLRP3 inflammasome\*adverse outcome).

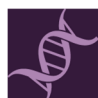

**Supplementary Table S11.** Number of target genes for each miRNA analyzed.

| miRNA           | N target genes |
|-----------------|----------------|
| hsa-miR-101-3p  | 418            |
| hsa-miR-125a-5p | 305            |
| hsa-miR-126-3p  | 10             |
| hsa-miR-146a-5p | 109            |
| hsa-miR-155-5p  | 253            |
| hsa-miR-195-5p  | 749            |
| hsa-miR-221-3p  | 182            |
| hsa-miR-223-5p  | 44             |
| hsa-miR-34a-5p  | 464            |

**Supplementary Table S12.** Target genes associated with inflammation.

| miRNA           | EntrezID | Gene            | UniProt | Protein Class              |
|-----------------|----------|-----------------|---------|----------------------------|
| hsa-miR-101-3p  | 10019    | <i>SH2B3</i>    | Q9UQQ2  |                            |
|                 | 1906     | <i>EDN1</i>     | P05305  | Signaling                  |
|                 | 351      | <i>APP</i>      | P05067  | Enzyme modulator           |
|                 | 3717     | <i>JAK2</i>     | O60674  | Kinase                     |
|                 | 5562     | <i>PRKAA1</i>   | Q13131  | Kinase                     |
|                 | 5743     | <i>PTGS2</i>    | P35354  | Enzyme                     |
|                 | 5806     | <i>PTX3</i>     | P26022  |                            |
| hsa-miR-101-3p  |          |                 |         |                            |
| hsa-miR-125a-5p | 6781     | <i>STC1</i>     | P52823  | Signaling                  |
| hsa-miR-34a-5p  |          |                 |         |                            |
| hsa-miR-125a-5p | 1236     | <i>CCR7</i>     | P32248  | G-protein coupled receptor |
|                 | 1978     | <i>EIF4EBP1</i> | Q13541  | Nucleic acid binding       |
|                 | 2056     | <i>EPO</i>      | P01588  |                            |
|                 | 3976     | <i>LIF</i>      | P15018  | Signaling                  |
|                 | 5770     | <i>PTPN1</i>    | P18031  |                            |
|                 | 6774     | <i>STAT3</i>    | P40763  | Nucleic acid binding       |
| hsa-miR-146a-5p | 5354     | <i>PLP1</i>     | P60201  | Cellular structure         |
|                 | 885      | <i>CCK</i>      | P06307  |                            |
| hsa-miR-155-5p  | 10135    | <i>NAMPT</i>    | P43490  | Signaling                  |
|                 | 1557     | <i>CYP2C19</i>  | P33261  |                            |

|                |       |              |        |                      |
|----------------|-------|--------------|--------|----------------------|
|                | 2252  | <i>FGF7</i>  | P21781 | Signaling            |
|                | 3091  | <i>HIF1A</i> | Q16665 | Transcription factor |
|                | 5970  | <i>RELA</i>  | Q04206 | Transcription factor |
|                | 8651  | <i>SOCS1</i> | O15524 | Enzyme modulator     |
| hsa-miR-195-5p |       |              |        |                      |
| hsa-miR-223-5p | 2182  | <i>ACSL4</i> | O60488 | Enzyme               |
| hsa-miR-34a-5p |       |              |        |                      |
|                | 2247  | <i>FGF2</i>  | P09038 | Signaling            |
|                | 4088  | <i>SMAD3</i> | P84022 | Transcription factor |
|                | 54567 | <i>DLL4</i>  | Q9NR61 |                      |
|                | 5979  | <i>RET</i>   | P07949 | Kinase               |
|                | 627   | <i>BDNF</i>  | P23560 | Signaling            |
| hsa-miR-195-5p | 7422  | <i>VEGFA</i> | P15692 | Signaling            |
|                | 7533  | <i>YWHAH</i> | Q04917 | Chaperone            |
|                | 8862  | <i>APLN</i>  | Q9ULZ1 |                      |
|                | 9332  | <i>CD163</i> | Q86VB7 | Enzyme               |
|                | 940   | <i>CD28</i>  | P10747 |                      |
|                | 958   | <i>CD40</i>  | P25942 |                      |
| hsa-miR-195-5p | 4092  | <i>SMAD7</i> | O15105 | Transcription factor |
| hsa-miR-34a-5p |       |              |        |                      |
|                | 3084  | <i>NRG1</i>  | Q02297 | Signaling            |
| hsa-miR-221-3p | 4908  | <i>NTF3</i>  | P20783 | Signaling            |
|                | 7532  | <i>YWHAG</i> | P61981 | Chaperone            |

|                |       |                 |        |                            |
|----------------|-------|-----------------|--------|----------------------------|
| hsa-miR-34a-5p | 1947  | <i>EFNB1</i>    | P98172 | Signaling                  |
|                | 23411 | <i>SIRT1</i>    | Q96EB6 | Epigenetic regulator       |
|                | 2532  | <i>ACKR1</i>    | Q16570 | G-protein coupled receptor |
|                | 2625  | <i>GATA3</i>    | P23771 |                            |
|                | 343   | <i>AQP8</i>     | O94778 | Ion channel                |
|                | 40    | <i>ASIC2</i>    | Q16515 | Ion channel                |
|                | 5054  | <i>SERPINE1</i> | P05121 | Enzyme modulator           |
|                | 50943 | <i>FOXP3</i>    | Q9BZS1 |                            |
|                | 5228  | <i>PGF</i>      | P49763 | Signaling                  |

**Supplementary Table S13.** Genes target by the 3 miRNAs and associated with gestational diabetes, premature birth or pre-eclampsia.

| miRNA           | Gene           | Disease                                                  |
|-----------------|----------------|----------------------------------------------------------|
| hsa-miR-125a-5p | <i>CYP24A1</i> | Gestational Diabetes                                     |
| hsa-miR-125a-5p | <i>FLOT2</i>   | Gestational Diabetes                                     |
| hsa-miR-125a-5p | <i>DICER1</i>  | Gestational Diabetes                                     |
| hsa-miR-125a-5p | <i>ANPEP</i>   | Gestational Diabetes                                     |
| hsa-miR-125a-5p | <i>LNPEP</i>   | Gestational Diabetes                                     |
| hsa-miR-125a-5p | <i>RREB1</i>   | Gestational Diabetes                                     |
| hsa-miR-155-5p  |                |                                                          |
| hsa-miR-195-5p  |                |                                                          |
| hsa-miR-125a-5p | <i>SLC26A6</i> | Gestational Diabetes                                     |
| hsa-miR-125a-5p | <i>SLC7A1</i>  | Gestational Diabetes                                     |
| hsa-miR-125a-5p | <i>STAT3</i>   | Gestational Diabetes                                     |
| hsa-miR-125a-5p | <i>VDR</i>     | Gestational Diabetes                                     |
| hsa-miR-125a-5p | <i>LIN28A</i>  | Gestational Diabetes                                     |
| hsa-miR-125a-5p | <i>MS4A3</i>   | Gestational Diabetes                                     |
| hsa-miR-155-5p  | <i>NAMPT</i>   | Gestational Diabetes                                     |
| hsa-miR-155-5p  | <i>GNAS</i>    | Gestational Diabetes<br>Premature Birth<br>Pre-Eclampsia |
| hsa-miR-155-5p  | <i>HIF1A</i>   | Gestational Diabetes<br>Pre-Eclampsia                    |
| hsa-miR-155-5p  | <i>SMAD2</i>   | Gestational Diabetes                                     |

|                |                |                                                          |
|----------------|----------------|----------------------------------------------------------|
| hsa-miR-155-5p | <i>RPS6KB1</i> | Gestational Diabetes                                     |
| hsa-miR-155-5p | <i>TCF7L2</i>  | Gestational Diabetes                                     |
| hsa-miR-155-5p | <i>ZNF236</i>  | Gestational Diabetes                                     |
| hsa-miR-195-5p | <i>ADAMTS5</i> | Gestational Diabetes                                     |
| hsa-miR-195-5p | <i>ADCY5</i>   | Gestational Diabetes                                     |
| hsa-miR-195-5p | <i>SLC30A8</i> | Gestational Diabetes                                     |
| hsa-miR-195-5p | <i>FASN</i>    | Gestational Diabetes                                     |
| hsa-miR-195-5p | <i>FGF2</i>    | Gestational Diabetes                                     |
| hsa-miR-195-5p | <i>FGFR1</i>   | Gestational Diabetes<br>Premature Birth                  |
| hsa-miR-195-5p | <i>COBLL1</i>  | Gestational Diabetes                                     |
| hsa-miR-195-5p | <i>GHR</i>     | Gestational Diabetes                                     |
| hsa-miR-195-5p | <i>GLS2</i>    | Gestational Diabetes                                     |
| hsa-miR-195-5p | <i>DLL1</i>    | Gestational Diabetes<br>Premature Birth                  |
| hsa-miR-195-5p | <i>HTR2A</i>   | Gestational Diabetes                                     |
| hsa-miR-195-5p | <i>IGF1R</i>   | Gestational Diabetes                                     |
| hsa-miR-195-5p | <i>INSR</i>    | Gestational Diabetes                                     |
| hsa-miR-195-5p | <i>LIPE</i>    | Gestational Diabetes                                     |
| hsa-miR-195-5p | <i>MTHFR</i>   | Gestational Diabetes<br>Premature Birth<br>Pre-Eclampsia |
| hsa-miR-195-5p | <i>PAPPA</i>   | Gestational Diabetes                                     |



|                 |                |                                                          |
|-----------------|----------------|----------------------------------------------------------|
| hsa-miR-195-5p  | <i>MAPK8</i>   | Gestational Diabetes                                     |
| hsa-miR-195-5p  | <i>PTCH1</i>   | Gestational Diabetes<br>Premature Birth                  |
| hsa-miR-195-5p  | <i>PTH</i>     | Gestational Diabetes                                     |
| hsa-miR-195-5p  | <i>BDNF</i>    | Gestational Diabetes                                     |
| hsa-miR-195-5p  | <i>SLC2A3</i>  | Gestational Diabetes                                     |
| hsa-miR-195-5p  | <i>SLC6A4</i>  | Gestational Diabetes                                     |
| hsa-miR-195-5p  | <i>SSR1</i>    | Gestational Diabetes                                     |
| hsa-miR-195-5p  | <i>VEGFA</i>   | Gestational Diabetes<br>Premature Birth<br>Pre-Eclampsia |
| hsa-miR-195-5p  | <i>CASR</i>    | Gestational Diabetes                                     |
| hsa-miR-195-5p  | <i>CDK5R1</i>  | Gestational Diabetes                                     |
| hsa-miR-195-5p  | <i>APLN</i>    | Gestational Diabetes<br>Pre-Eclampsia                    |
| hsa-miR-195-5p  | <i>CD163</i>   | Gestational Diabetes                                     |
| hsa-miR-125a-5p | <i>SLC27A4</i> | Premature Birth                                          |
| hsa-miR-125a-5p | <i>IL6R</i>    | Premature Birth                                          |
| hsa-miR-125a-5p | <i>PMM2</i>    | Premature Birth                                          |
| hsa-miR-155-5p  | <i>KRAS</i>    | Premature Birth                                          |
| hsa-miR-155-5p  | <i>TPRKB</i>   | Premature Birth                                          |
| hsa-miR-155-5p  | <i>ACTA1</i>   | Premature Birth                                          |
| hsa-miR-195-5p  | <i>CRKL</i>    | Premature Birth                                          |

|                 |                |                 |
|-----------------|----------------|-----------------|
| hsa-miR-195-5p  | <i>COL24A1</i> | Premature Birth |
| hsa-miR-195-5p  | <i>RBPJ</i>    | Premature Birth |
| hsa-miR-195-5p  | <i>KMT2A</i>   | Premature Birth |
| hsa-miR-195-5p  | <i>PEX12</i>   | Premature Birth |
| hsa-miR-195-5p  | <i>PEX13</i>   | Premature Birth |
| hsa-miR-195-5p  | <i>DLL4</i>    | Premature Birth |
| hsa-miR-125a-5p | <i>IL16</i>    | Pre-Eclampsia   |
| hsa-miR-155-5p  | <i>TDO2</i>    | Pre-Eclampsia   |
| hsa-miR-195-5p  | <i>COMT</i>    | Pre-Eclampsia   |
| hsa-miR-195-5p  | <i>SERBP1</i>  | Pre-Eclampsia   |
| hsa-miR-195-5p  | <i>EED</i>     | Pre-Eclampsia   |
| hsa-miR-195-5p  | <i>ACVR2A</i>  | Pre-Eclampsia   |

**Supplementary Table S14.** Genes targeted by the 3 miRNAs and shared between the two groups (inflammation and pregnancy complications).

| miRNA           | Gene         |
|-----------------|--------------|
| hsa-miR-195-5p  | <i>APLN</i>  |
| hsa-miR-195-5p  | <i>BDNF</i>  |
| hsa-miR-195-5p  | <i>CD163</i> |
| hsa-miR-195-5p  | <i>DLL4</i>  |
| hsa-miR-195-5p  | <i>FGF2</i>  |
| hsa-miR-155-5p  | <i>HIF1A</i> |
| hsa-miR-155-5p  | <i>NAMPT</i> |
| hsa-miR-125a-5p | <i>STAT3</i> |
| hsa-miR-195-5p  | <i>VEGFA</i> |
